# Supplementary material for: A positive fluid balance is an independent prognostic factor in patients with sepsis
Source: PubMed Central journal article supplement (PMC4479078; doi:10.1186/s13054-015-0970-1), 2015-06-15
Supplement: 13054_2015_970_MOESM1_ESM.pdf [file 13054_2015_970_MOESM1_ESM.pdf]

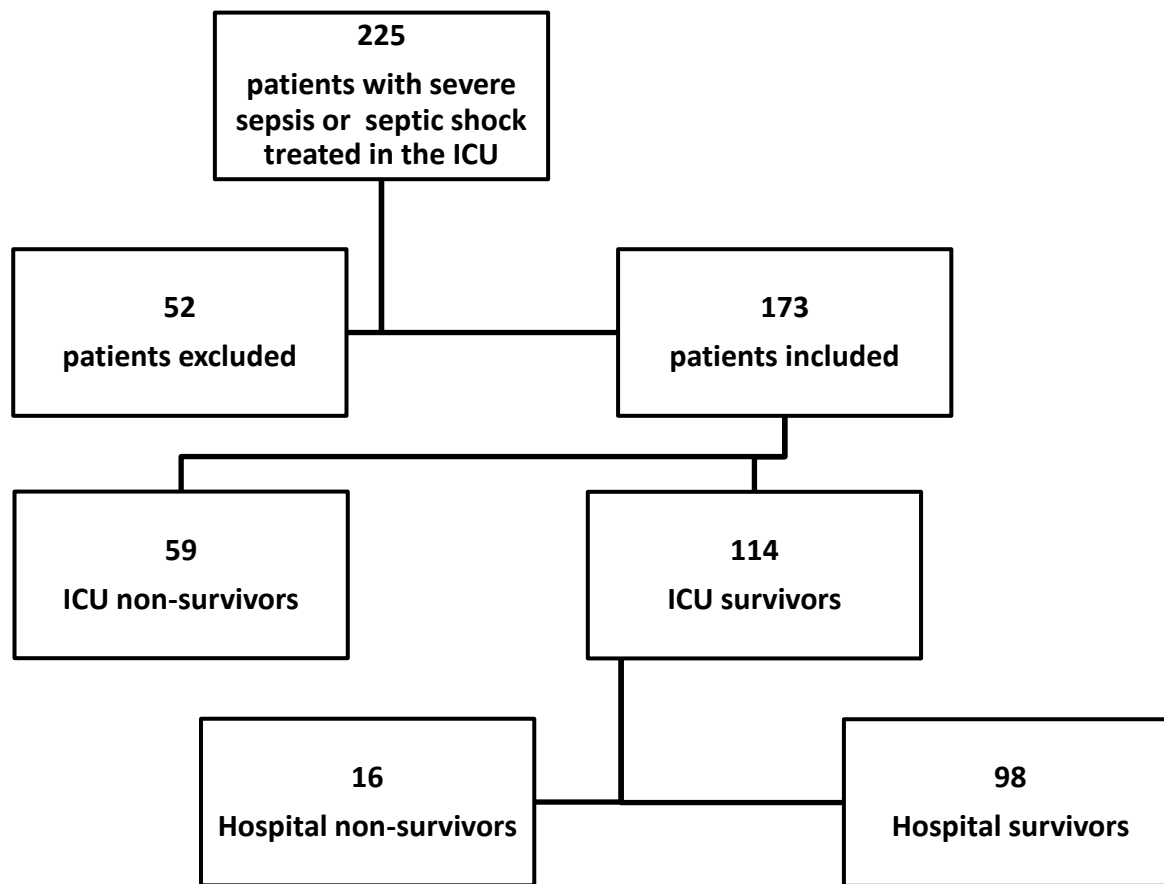

**Additional file 1.** Consort diagram
