# Supplementary material for: A positive fluid balance is an independent prognostic factor in patients with sepsis
Source: PubMed Central journal article supplement (PMC4479078; doi:10.1186/s13054-015-0970-1), 2015-06-15
Supplement: 13054_2015_970_MOESM4_ESM.pdf [file 13054_2015_970_MOESM4_ESM.pdf]

Additional file 4. Univariate and multivariable analyses in all patients and the subgroup with shock

| Variables               | All patients        |         |                     |         | Septic shock patients |         |                     |         |
|-------------------------|---------------------|---------|---------------------|---------|-----------------------|---------|---------------------|---------|
|                         | Univariate          |         | Multivariable       |         | Univariate            |         | Multivariable       |         |
|                         | HR (95% IC)         | P-value | aHR (95% IC)        | P-value | HR (95% IC)           | P-value | aHR (95% IC)        | P-value |
| Age (years)             | 1.019 (1.003-1.036) | 0.02    | 1.025 (1.005-1.043) | 0.01    | 1.018 (1.002-1.036)   | 0.03    | 1.025 (1.005-1.046) | 0.01    |
| Male                    | 0.90 (0.53-1.53)    | 0.7     |                     |         | 0.94 (0.55-1.60)      | 0.81    |                     |         |
| SOFA total at admission | 1.03 (0.96-1.11)    | 0.4     |                     |         | 1.01 (0.94-1.09)      | 0.7     |                     |         |
| Cardiovascular subscore | 1.11 (0.91-1.35)    | 0.31    |                     |         | 0.98 (0.79-1.22)      | 0.86    |                     |         |
| Renal subscore          | 0.91 (0.71-1.15)    | 0.43    |                     |         | 0.90 (0.70-1.16)      | 0.42    |                     |         |
| Coagulation subscore    | 1.02 (0.80-1.30)    | 0.86    |                     |         | 1.04 (0.81-1.35)      | 0.74    |                     |         |
| Lung subscore           | 1.15 (0.93-1.42)    | 0.19    |                     |         | 1.12 (0.91-1.39)      | 0.29    |                     |         |
| Hepatic subscore        | 1.21 (0.98-1.48)    | 0.07    | 1.21 (0.97-1.50)    | 0.09    | 1.22 (1.00-1.50)      | 0.05    | 1.26 (1.009-1.57)   | 0.04    |
| Neuro subscore          | 0.94 (0.80-1.10)    | 0.42    |                     |         | 0.94 (0.80-1.10)      | 0.43    |                     |         |
| Origin                  |                     |         |                     |         |                       |         |                     |         |
| Emergency room          |                     | ref     |                     |         |                       | ref     |                     |         |
| Ambulance               | 0.42 (0.10-1.84)    | 0.25    |                     |         | 0.42 (0.10-1.87)      | 0.26    |                     |         |
| Hospital ward           | 0.72 (0.38-1.37)    | 0.31    |                     |         | 0.76 (0.40-1.45)      | 0.41    |                     |         |
| Other hospital          | 0.49 (0.22-1.08)    | 0.08    |                     |         | 0.45 (0.20-1.02)      | 0.06    |                     |         |
| Type of admission       |                     |         |                     |         |                       |         |                     |         |
| Medical                 |                     | ref     |                     |         |                       | ref     |                     |         |
| Elective surgery        | 0.95 (0.40-2.28)    | 0.91    | 1.09 (0.43-2.75)    | 0.86    | 0.98 (0.41-2.36)      | 0.97    | 1.16 (0.45-2.98)    | 0.76    |
| Emergency surgery       | 1.72 (0.90-3.31)    | 0.1     | 2.29 (1.14-4.58)    | 0.02    | 1.78 (0.92-3.42)      | 0.09    | 2.40 (1.19-4.83)    | 0.01    |
| Comorbidities           |                     |         |                     |         |                       |         |                     |         |
| Coronary artery disease | 1.50 (0.75-3.00)    | 0.25    |                     |         | 1.57 (0.79-3.15)      | 0.2     |                     |         |
| Hypertension            | 1.19 (0.66-2.13)    | 0.56    |                     |         | 1.21 (0.66-2.22)      | 0.53    |                     |         |
| COPD                    | 1.32 (0.62-2.80)    | 0.48    |                     |         | 1.27 (0.59-2.69)      | 0.54    |                     |         |
| Cirrhosis               | 2.09 (1.04-4.18)    | 0.04    |                     |         | 2.33 (1.16-4.69)      | 0.02    |                     |         |
| Diabetes                | 0.82 (0.45-1.50)    | 0.53    |                     |         | 0.92 (0.49-1.71)      | 0.79    |                     |         |
| Cancer                  | 2.65 (1.49-4.70)    | <0.001  | 1.99 (1.09-3.68)    | 0.03    | 2.60 (1.46-4.63)      | 0.001   | 1.89 (1.03-3.50)    | 0.04    |
| Immunosuppression       | 1.60 (0.68-3.79)    | 0.29    |                     |         | 1.46 (0.61-3.45)      | 0.4     |                     |         |
| Diuresis/RRT            |                     |         |                     |         |                       |         |                     |         |
| Spontaneous diuresis    |                     | ref     |                     |         |                       | ref     |                     |         |

|                           |                     |        |                     |        |                     |        |                     |        |
|---------------------------|---------------------|--------|---------------------|--------|---------------------|--------|---------------------|--------|
| Diuretics                 | 2.05 (1.02-4.11)    | 0.04   |                     |        | 2.04 (1.00-4.18)    | 0.05   |                     |        |
| Renal replacement therapy | 1.62 (0.79-3.33)    | 0.19   |                     |        | 1.51 (0.72-3.17)    | 0.28   |                     |        |
| Fluid balance (ml/kg)     | 1.014 (1.008-1.021) | <0.001 | 1.014 (1.007-1.022) | <0.001 | 1.013 (1.006-1.020) | <0.001 | 1.013 (1.005-1.020) | <0.001 |
| Septic shock              | 3.86 (0.94-15.91)   | 0.06   |                     |        | na                  | na     | na                  | na     |

---
